# Supplementary material for: A Campylobacter integrative and conjugative element with a CRISPR-Cas9 system targeting competing plasmids: a history of plasmid warfare?
Source: PubMed Central journal article supplement (PMC8743540; doi:10.1099/mgen.0.000729), 2021-11-12
Supplement: mgen-7-0729-s001.pdf [file mgen-7-0729-s001.pdf]

## LEGENDS TO SUPPLEMENTARY INFORMATION

**Figure S1.** Alignment of the native *C. jejuni* and *C. coli* Cas9 proteins with the CampyICE1 Cas9 proteins from *C. jejuni* and *C. coli* clades. Part A shows an alignment of the *C. jejuni* chromosomal Cas9 protein with the CampyICE1 Cas9 from a *C. jejuni* strain, whereas Part B combines the different version from the *C. jejuni* and *C. coli* clades. Asterisks indicate identical residues, full stops and colon indicate conservative substitutions. Functional domains of Cas9 are indicated in yellow shading, while conserved amino acid residues are highlighted by underlined bold typeface [34].

**Figure S2.** Genetic structure of CampyICE1 and related mobile genetic elements (integrative conjugative elements) present in related *Campylobacter* species, presented as output of a comparison of Prokka-generated annotations [38] using Clinker [43].

**Figure S3.** Graphical representation of genetic variability of the mobile elements CJIE1, CJIE2, CJIE3 and CJIE4 from *C. jejuni* and *C. coli* genomes, presented as output of a comparison of Prokka-generated annotations [38] using Clinker [43].

**Figure S4.** Graphical representation of genetic variability of the plasmids pCC42, pTet and pVir from *C. jejuni* and *C. coli* genomes, presented as output of a comparison of Prokka-generated annotations [38] using Clinker [43].

**Table S1.** Overview of *C. jejuni* and *C. coli* genomes used in this study, with the Genbank or Campylobacter PubMLST accession numbers, metadata (source, MLST clonal complex, sequence type), and the presence/absence of the CJIE1-4 and CampyICE1 mobile elements and the pCC42, pTet and pVir plasmids. The position on the cgMLST tree used in Figures 3 and 4 is provided for

ordering purposes.

**Table S2.** Sequences of CampyICE1 spacers and variant families with their predicted targets, as identified using CRISPRTarget [42].

**Table S3.** Description of the three CampyICE1 spacer arrays per CampyICE1-positive *C. jejuni* or *C. coli* genome, and linkage to plasmid carriage.

**Table S4.** Distribution of CampyICE1 plasmid-specific CRISPR-spacers and pVir, pTet and pCC42 plasmids in CampyICE1-positive *C. jejuni* and *C. coli*.

van Vliet et al, Figure S1

Part A

|              | RuvC I                                                                                                                            | R-rich region                                                                     |
|--------------|-----------------------------------------------------------------------------------------------------------------------------------|-----------------------------------------------------------------------------------|
| Cj_Cas9      | VARILAF <b>DI</b> GISSIG <b>WA</b> FSENDELKDCGVRIFTKVENPKT <b>GESLALP</b> <b>RRLARSARKRLAR</b>                                    |                                                                                   |
| Cj_ICE1_Cas9 | -MKIIGF <b>NL</b> GIANIG <b>WA</b> LRENDEIIDCGVRVFDIPENPKNG <b>NSLALERRENKARMKIVK</b> R                                           |                                                                                   |
|              | : : * : : * : * : * : * : * : * : * : * : * : * : * : * : * : *                                                                   | : : * : * : * : * : * : * : * : * : * : * : * : * : *                             |
| Cj_Cas9      | <b>R</b> KARLNHLKHLIANEF <b>KLN</b> YEDYQSFDESLAKAYKGLISPYELRFRALNELLSKQDFAR                                                      |                                                                                   |
| Cj_ICE1_Cas9 | <b>K</b> KARMLATK <b>TFLK</b> KELV <b>DLS</b> -----KLFLIGSTQSIYELRTKALSSLSKEELSA                                                  |                                                                                   |
|              | : * * * : * : : * : * : * : * : * : * : * : * : * : * : * : * : *                                                                 | : * * : * * * * : * * * : * * * : * * * : * * * : * * * : * * * : *               |
| Cj_Cas9      | VILHIAKRGRYDDIKNSDDKEKGAILKAIKQNEEKLANYQSVGEYLYKEYFQKFKENSKE                                                                      |                                                                                   |
| Cj_ICE1_Cas9 | IILHIAKHRGYDSSALKN--ENGTIIIEALNKNKEAMLKFKSVGEYFYKNFVQ-----NKE                                                                     |                                                                                   |
|              | : * * * * * : * * * * * : * : * : * : * : * : * : * : * : * : * : * : * : *                                                       | : * * * * * : * * * * * : * * * * * : * * * * * : * * * * * : * * * * * : *       |
| Cj_Cas9      | FTNVRNKESYERCIAQSFLLKDELKLIFFKQREFGFSFSSKFFEEVLSVAFYKRALKD                                                                        |                                                                                   |
| Cj_ICE1_Cas9 | VKKIRNTTEDYSNSVPRSLKQELDLILDQKELGLIKNADFKAFLFEIIFKRP                                                                              |                                                                                   |
|              | . . . : * * . * . * . . . . : * : * : * : * : * : * : * : * : * : * : * : * : *                                                   | . . . : * * . * . * . . . . : * : * : * : * : * : * : * : * : * : * : * : * : *   |
| Cj_Cas9      | HLVGNCSFFTDEKRAPKNSPLAFMFVALTRIIINLLNLLKNTGILYTKDDLNALLNEVLK                                                                      |                                                                                   |
| Cj_ICE1_Cas9 | NKIGNCIFFENEKRAAKNTISACEFVALGKVVNLLKSEKDIGIVYEKDSINEIMSII                                                                         |                                                                                   |
|              | : : * * * * : * * * * * : * : * * * : * * * * : * * * * * : * * * * : * * * * : *                                                 | : : * * * * : * * * * * : * : * * * : * * * * : * * * * * : * * * * : * * * * : * |
| Cj_Cas9      | NGTLTYKQTKKLLGLSDDYEFK-----GEKGYFIEFKYKEFIKALGE--HNLSQDD                                                                          |                                                                                   |
| Cj_ICE1_Cas9 | KTSISYKIRDILNLPQDINFKGLDYSKNNNAENSKLVLDLKLNEFKKALGDGFTNLDKDI                                                                      |                                                                                   |
|              | : : : * * : : * * * : * : * * : * * : * * : * * : * * : * * : * * : * * : *                                                       | : : : * * : : * * * : * : * * : * * : * * : * * : * * : * * : * * : * * : *       |
| Cj_Cas9      | LNEIAKDITLIKDEIKLKALAKY-DLNQNDLSKLEFKDHLNLSFKALKLVTPMLME                                                                          |                                                                                   |
| Cj_ICE1_Cas9 | LDSIATDITLTKDTATLKEKLNKYNVNLNAEQIEKLSLVFNDHINLSLKALKQIIP                                                                          |                                                                                   |
|              | * : * * . * * * * * * : * : * : * : * * : * : * : * : * : * : * : * : * : *                                                       | * : * * . * * * * * * : * : * : * : * * : * : * : * : * : * : * : * : * : *       |
| Cj_Cas9      | GKKYDEACNELNLKVAINEDKKDFLPAFNETYKDEVTPNVVLRRAIKEYRVLNALLKKY                                                                       |                                                                                   |
| Cj_ICE1_Cas9 | GKRYDEACELCNFTIAKNQEKSEYLPLFEKTRFAKDISSPVVIRAIKFRLLNDIIRY                                                                         |                                                                                   |
|              | * : * : * * * : * : * * : * : * : * : * : * : * : * : * : * : * : * : *                                                           | * : * : * * * : * : * * : * : * : * : * : * : * : * : * : * : * : * : *           |
|              |                                                                                                                                   | RuvC II                                                                           |
| Cj_Cas9      | GKVHK <b>I</b> NI <b>EL</b> AREVGNHSQRAKIEKEQNENYKAKKDAELECEKGLKINSKNILKRL                                                        |                                                                                   |
| Cj_ICE1_Cas9 | GSVHK <b>I</b> H <b>EL</b> TRDFGISFSDRKKIIEIEQNEQSRIKALETIKELKLETSKNIQIVR                                                         |                                                                                   |
|              | * . * * * * : * : * : * : * * : * : * : * : * : * : * : * : * : * : *                                                             | * . * * * * : * : * : * : * * : * : * : * : * : * : * : * : * : * : *             |
|              |                                                                                                                                   | HNH domain                                                                        |
| Cj_Cas9      | KEQKEFCAYSGEKIKISDLQDEKML <b>E</b> IDH <b>I</b> YPYSRSFDDSY <b>M</b> N <b>K</b> VLVFT <b>K</b> Q <b>N</b> QEKLNQ                  |                                                                                   |
| Cj_ICE1_Cas9 | EDQKGICPYSGLKMDLNRLE---L <b>V</b> ID <b>V</b> IRPYNRSLDDSY <b>S</b> N <b>K</b> ILT <b>F</b> K <b>L</b> SDLKQK                     |                                                                                   |
|              | : * * * : * . * * * * * : * : * : * : * * : * * * : * * * : * * * : * * * : *                                                     | : * * * : * . * * * * * : * : * : * : * * : * * * : * * * : * * * : * * * : *     |
| Cj_Cas9      | FEAFGNSAKWQKIEVLAKNLPTKKQKRILDKNYKDKEQKNFKDRNLNDRYIARLV                                                                           |                                                                                   |
| Cj_ICE1_Cas9 | FEAFGEDEKLWAEINERIKYNGKKRFKIFDKFFKDKKPFDFTEQTLQDTRWLTKL                                                                           |                                                                                   |
|              | * * * * * : * : * * : * : * : * * : * * : * * : * * : * * : * * : * * : *                                                         | * * * * * : * : * * : * : * : * * : * * : * * : * * : * * : * * : * * : *         |
|              |                                                                                                                                   | RuvC III                                                                          |
| Cj_Cas9      | TKDYLDLPLSDDENTKLN <b>T</b> QKGSKVHVEAKSGMLTSALRHTWGFSAKDRNNH <b>H</b> HA <b>I</b> D                                              |                                                                                   |
| Cj_ICE1_Cas9 | LNEYLSFLPISEDENTALGYGEKGSQHVVLSSGMITQMLRNFWYLGFKNHKDY <b>K</b> NN <b>A</b> M <b>D</b>                                             |                                                                                   |
|              | : * * . * * : * * * * * : * : * * * : * * : * * : * * : * * : * * : * * : *                                                       | : * * . * * : * * * * * : * : * * * : * * : * * : * * : * * : * * : * * : *       |
| Cj_Cas9      | <b>A</b> V <b>I</b> IAYANNSIVKAFSDFKKEQESNSAELYAKKISELDYKNKRKFFPEPFSGRQK                                                          |                                                                                   |
| Cj_ICE1_Cas9 | <b>A</b> I <b>I</b> VAF <b>T</b> TNSIIFAFNFKKELDLAKAEFYANKISESDYLLK <b>R</b> KFLPPFS <b>G</b> FK <b>E</b> Q <b>A</b> L <b>E</b> K |                                                                                   |
|              | * : * : * : * : * * : * * : * * : * : * : * * * : * * : * * * : * * : *                                                           | * : * : * : * : * * : * * : * * : * : * : * * * : * * : * * * : * * : *           |
| Cj_Cas9      | DEIFVSKPERKKPSGALHEETFRKEEEFYQSYGGKEGVLKALELKGIRKVN <b>G</b> KIVK--                                                               |                                                                                   |
| Cj_ICE1_Cas9 | KNIFVSHSLKIKNKGT <b>L</b> HE <b>L</b> TPLKIKELKNTYGD <b>L</b> D---LAVK <b>L</b> GKIRKYN <b>D</b> KYYAN <b>A</b>                   |                                                                                   |
|              | . : * * * * : * : * * * : * : * * : * * : * * : * * : * * : * * : * * : *                                                         | . : * * * * : * : * * * : * : * * : * * : * * : * * : * * : * * : * * : *         |

Cj\_Cas9 DMFRVDIFKHKKTNKFYAVPIYTMDFALKVLPNKAVARSKKGEIKDWILMDENYEFCSL  
Cj\_ICE1\_Cas9 SLVRADLFVDKK-NKFHAVSIYKADFSTKKLPNKTPATTSNGETKEGIEMNENYNFCMSL  
.:\*.:\* .\* \*\*:\*\*.\*\*.\* \*\*:\* \* \*\*:\* \* :.:\*\* \*:\* \* \*.\*\*\*:\*\*\*:\*  
  
Cj\_Cas9 YKDSLILIQTKDMQEPEFVYNAFTSSTVSLIVSKHDNKFETLSKNQKILFKNANEKEVI  
Cj\_ICE1\_Cas9 YKNTPISVKIKGMKEPIICYHGFNTSGSKITYKKHDNNYHNLSEDEMVFVR-KNDK--  
\*\*:\* \* :.: \*.\*:\*\* : \*\*.\*.\*:\* .: .\*\*\*:..\*\*::: :.\*: \*:\*  
  
Cj\_Cas9 AKSIGIQNLKVFKEYIVSALGEVTKAEFRQREDFKK  
Cj\_ICE1\_Cas9 -ESIAVGKILEIKKYSISPSGELSLIENEERKWF--  
:\*.:.: :.: \*\* :\*. \*\*:\* \* .:\*: \*

Part B

RuvC I

C\_jejuni\_Cas9 VARILAFDIGISSIGWAFSENDELKDCGVRIFTKVENPKTGESLALPRRL  
C\_coli\_Clade1a\_Cas9 MARILAFDIGISSIGWAFSENDELKDCGVRIFTKAENPKTGESLALPRRL  
C\_coli\_Clade1b\_Cas9 MARILAFDIGISSIGWAFSENDELKDCGVRIFTKAENPKTGESLALPRRL  
C\_coli\_Clade1c\_Cas9 -MKILGFDIGINSIGWAFVEDNQLQDCGVRLFTKAEDPKTKESLALPRRN  
C\_coli\_Clade2\_Cas9 -MKILGFDIGINSIGWAFVEDNQLQDCGVRLFTKAEDPKRRESLALPRRN  
C\_coli\_Clade3\_Cas9 -MKILGFDIGINSIGWAFVEDNQLQDCGVRLFTKAEDPKTKESLALPRRN  
C\_jejuni\_ICE1\_Cas9 -MKIIGFNLGIANIGWALRENDEIIDCGVRVFDIPENPKNGNSLALERRE  
C\_coli\_ICE1\_Clade1a\_Cas9 -MKIIGFNLGIANIGWALRENDEIIDCGVRVFDIPENPKNGNSLALERRE  
C\_coli\_ICE1\_Clade1c\_Cas9 -MKILGFNLGIANIGWALRVNDEIIDCGVRVFDIPENPKNGNSLALERRE  
C\_coli\_ICE1\_Clade2\_Cas9 -MKILGFNLGIANIGWALRENDEIIDCGVRVFDIPENPKNGNSLALERRE  
C\_coli\_ICE1\_Clade3\_Cas9 -MKILGFNLGIANIGWALRVNDEIIDCGVRVFDIPENPKNGNSLALERRE

R-rich region

C\_jejuni\_Cas9 ARSARKRLARRKARLNHLKHLIANEFKLNVEDYQSFDES LAKAYKGLIS  
C\_coli\_Clade1a\_Cas9 ARSARKRLARRKARLNHLKHLIANEFKLNVEDYQSFDES LAKAYKGLIS  
C\_coli\_Clade1b\_Cas9 ARSARKRLARRKARLNHLKHLIANEFKLNVEDYQSFDES LAKAYKGLIS  
C\_coli\_Clade1c\_Cas9 ARSNRRRLGRRRSRLIALKHIISKELKLNQDYMANDREL PKAYEGR LIS  
C\_coli\_Clade2\_Cas9 ARSNRRRLGRRRSRLIALKHIISKELKLNQDYIANDGELPKAYEGR LVS  
C\_coli\_Clade3\_Cas9 ARSNRRRLGRRRSRLIALKHIISKELKLNQDYIANDGELPKAYEGR LVS  
C\_jejuni\_ICE1\_Cas9 NKARMKIVKRKKARMLATKTFLKKE LNV DLSKLF LIGS-----TQS  
C\_coli\_ICE1\_Clade1a\_Cas9 NKARMKIVKRKKARMLATKTFLKKE LNV DLSKLF LIGS-----TQS  
C\_coli\_ICE1\_Clade1c\_Cas9 NKARMKTIKRKKARMLTTKTFLKKE FGI DLSKLF LIGS-----TQS  
C\_coli\_ICE1\_Clade2\_Cas9 NKARMKTIKRKKARMLTTKTFLKKE FGI DLSKLF LIGS-----TQS  
C\_coli\_ICE1\_Clade3\_Cas9 NKARMKTIKRKKARMLTTKTFLKKE FGI DLSKLF LIGS-----TQS

C\_jejuni\_Cas9 PYELRFRALNELLSKQDFARVILHI AKRRGYDD--IKNSDDKEKGAILKA  
C\_coli\_Clade1a\_Cas9 PYELRFRALNELLSKQDFARVILHI AKRRGYDD--IKNNGDEEKSEILKA  
C\_coli\_Clade1b\_Cas9 PYELRFRALNELLSKQDFARVILHI AKRRGYDD--IKNSDDKEKGAILKA  
C\_coli\_Clade1c\_Cas9 PYELRYKALNEKIEPKDLARVILHI AKHRGYMKNKNEKSSDNEKGKILSA  
C\_coli\_Clade2\_Cas9 PYELRYKALNEKIEPKDLARVILHI AKHRGYMKNKNEKSSDNEKGKILSA  
C\_coli\_Clade3\_Cas9 PYELRYKALNEKIEPKDLARVILHI AKHRGYMKNKNEKSSDNEKGKILSA  
C\_jejuni\_ICE1\_Cas9 IYELRTKALSSLISKEELSAIILHI AKHRGYDDSA LKN----ENGTII EA  
C\_coli\_ICE1\_Clade1a\_Cas9 IYELRTKALSSLISKEELSAIILHI AKHRGYDDSA LKN----ENGTII EA  
C\_coli\_ICE1\_Clade1c\_Cas9 IYELRTKALNSLISKEELAAIILHI AKHRGYDDSA LKN----ENGIIEA  
C\_coli\_ICE1\_Clade2\_Cas9 IYELRTKALNSLISKEELAAIILHI AKHRGYDDSA LKN----ENGIIEA  
C\_coli\_ICE1\_Clade3\_Cas9 IYELRTKALNSLISKEELAAIILHI AKHRGYDDSA LKN----ENGIIEA

C\_jejuni\_Cas9 IKQNEEKLANYQSVGEYLYKEYFQKFKENSKEFTNVRNKESYERCIAQS  
C\_coli\_Clade1a\_Cas9 IKQNEEKLANYQSVGEYLYKEYFQKFKENSKEFTNVRNKESYERCIAQS  
C\_coli\_Clade1b\_Cas9 IKQNEEKLANYQSVGEYLYKEYFQKFKENSKEFTNVRNKESYERCIAQS  
C\_coli\_Clade1c\_Cas9 LKTNALKLEKYQSVGEYFYKEFFQKHKENTKDFINIRNKKGSYDNCV LAS  
C\_coli\_Clade2\_Cas9 LKTNALKLEKYQSVGEYFYKEFFQKYKENTKDFINIRNKEGSYENCV LAS  
C\_coli\_Clade3\_Cas9 LKTNALKLEKYQSVGEYFYKEFFQKYRENTKDFINIRNKEGSYENCV LAS  
C\_jejuni\_ICE1\_Cas9 LKNKNEAMLKFKSVGEYFYKNFVQN----KEVKKIRNTTEDYSNSVPRS  
C\_coli\_ICE1\_Clade1a\_Cas9 LKNKNEAMLKFKSVGEYFYKNFVQN----KEVKKIRNTTEDYSNSVPRS  
C\_coli\_ICE1\_Clade1c\_Cas9 LKNKNEAMLKFKSVGEYFYKNFVQS----KEVRKIRNTTEDYSNSIPRS  
C\_coli\_ICE1\_Clade2\_Cas9 LKNKNEAMLKFKSVGEYFYKNFVQS----KEVRKIRNTTEDYSNSIPRS  
C\_coli\_ICE1\_Clade3\_Cas9 LKNKNEAMLKFKSVGEYFYKNFVQS----KEVRKIRNTTEDYSNSIPRS

C\_jejuni\_Cas9  
C\_coli\_Clade1a\_Cas9  
C\_coli\_Clade1b\_Cas9  
C\_coli\_Clade1c\_Cas9  
C\_coli\_Clade2\_Cas9  
C\_coli\_Clade3\_Cas9  
C\_jejuni\_ICE1\_Cas9  
C\_coli\_ICE1\_Clade1a\_Cas9  
C\_coli\_ICE1\_Clade1c\_Cas9  
C\_coli\_ICE1\_Clade2\_Cas9  
C\_coli\_ICE1\_Clade3\_Cas9  
FLKDELKLIFFKKQREFGFSFSKFFEEVLSVAFYKRALKDFSHLVGNCSF  
FLKDELKLIFFKQREFGFSFSKFFEEVLSVAFYKRALKDFSHLVGNCSF  
FLKDELKLIFFKKQREFGFSFSKFFEEVLSVAFYKRALKDFSHLVGNCSF  
DLEKELKLILEKQKEWGYSDDNFIKEILKVAFFQRPLKDFSYLVGCTF  
DLEKELKLILEKQKEWGYSYDNFIKEILKVAFFQRPLKDFSYLVGACTF  
DLEKELKLILEKQKEWGYSYDNFIKEILKVAFFQRPLKDFSYLVGACTF  
LLKQELDLILDQKQELGLIKNADFKAFLFEIIFFKRPLKDFSNKIGNCIF  
LLKQELDLILDQKQELGLIKNADFKEKLFEEIFFKRPLKDFSNKIGNCIF  
LLKQELDLILNKQKELGLIKNADFKEKLFEEIFFKRPLKDFSNKIGNCIF  
LLKQELDLILNKQKELGLIKNADFKEKLFEEIFFKRPLKDFSNKIGNCIF  
\*.:\*\*.\*\*:\*\*.\* \* . .\* :::: \*.:\*.\*\*\*\*\* :\* \*\*

C\_jejuni\_Cas9  
C\_coli\_Clade1a\_Cas9  
C\_coli\_Clade1b\_Cas9  
C\_coli\_Clade1c\_Cas9  
C\_coli\_Clade2\_Cas9  
C\_coli\_Clade3\_Cas9  
C\_jejuni\_ICE1\_Cas9  
C\_coli\_ICE1\_Clade1a\_Cas9  
C\_coli\_ICE1\_Clade1c\_Cas9  
C\_coli\_ICE1\_Clade2\_Cas9  
C\_coli\_ICE1\_Clade3\_Cas9  
FTDEKRAPKNSPLAFMFVALTRIINLLNNLKNTEGILYTKDDLNALLNEV  
FTDEKRAPKNSPLAFMFVALTRIINLLNNLKNTEGILYTKDDLNALLNEV  
FTDEKRAPKNSPLAFMFVALTRIINLLNNLKNTEGILYTKDDLNALLNEV  
FEDEKRACKNSYSAWEFVALTKIINELKSLEKESGELVSSQIINEILNHV  
FEDEKRACKNSYSAWEFVALTKIINELKSLEKESGELVSSQIINEILNHI  
FEDEKRACKNSYSAWEFVALTKIINELKSLEKESGELVSSQIINEILNHI  
FENEKRAAKNTISACEFVALGKVVNLLKSIEKDIGIVYEKDSINEIMSI  
FENEKRAAKNTISACEFVALGKVVNLLKSIEKDIGIVYEKDSINEIMSI  
FENEKRAAKNTLSACEFVALGKVINLLKSIEKDTGIVYEKDIISEIMNI  
FENEKRAAKNTLSACEFVALGKVINLLKSIEKDTGIVYEKDIISEIMNI  
FENEKRAAKNTLSACEFVALGKVINLLKSIEKDTGIVYEKDIISEIMNI  
\* :\*\*\*\* \*\* : \* \*\*\*\* :.:\* \*.:::: \* : .: .: .: .:

C\_jejuni\_Cas9  
C\_coli\_Clade1a\_Cas9  
C\_coli\_Clade1b\_Cas9  
C\_coli\_Clade1c\_Cas9  
C\_coli\_Clade2\_Cas9  
C\_coli\_Clade3\_Cas9  
C\_jejuni\_ICE1\_Cas9  
C\_coli\_ICE1\_Clade1a\_Cas9  
C\_coli\_ICE1\_Clade1c\_Cas9  
C\_coli\_ICE1\_Clade2\_Cas9  
C\_coli\_ICE1\_Clade3\_Cas9  
LKNGLTYKQTKKLLGLSDDYEFKG-----EKGTYFIEFKKYKEFIKA  
LKNGLTYKQTKKLLGLSDDYEFKG-----EKGTYFIEFKKYKEFIKA  
LKNGLTYKQTKKLLGLSDDYEFKG-----EKGTYFIEFKKYKEFIKA  
LDKGSITYKFFREYIKLHESMKFKSLKYDKDNAESTKLIIEFRKLVFEFKKA  
LDKGSITYKFFREYIKLHESMKFKSLKYDKDNAESVKLIEFRKLVFEFKKA  
LDKGSITYKFFREYIKLHESMKFKSLKYDKDNVESTKLIIEFRKLVFEFKKA  
LDKTSISYKKIRDILNLPQDINFKGLDYSKNNAENSKLVDLKLLNEFKKA  
LDKTSISYKKIRDILNLPQDINFKGLDYSKNNAENSKLVDFKLLNEFKKA  
LNKASISYKKIRDILNLPQDISFKGLDYSKNNAENSKLVDFKLLNEFKKA  
LNKASISYKKIRDILNLPQDISFKGLDYSKNNAENSKLVDFKLLNEFKKA  
LNKASISYKKIRDILNLPQDISFKGLDYSKNNAENSKLVDFKLLNEFKKA  
\*.: :\*\*\*\*: .: : \* :. \*\*. .: :\*\*\*\*\* \*\* \*\*

C\_jejuni\_Cas9  
C\_coli\_Clade1a\_Cas9  
C\_coli\_Clade1b\_Cas9  
C\_coli\_Clade1c\_Cas9  
C\_coli\_Clade2\_Cas9  
C\_coli\_Clade3\_Cas9  
C\_jejuni\_ICE1\_Cas9  
C\_coli\_ICE1\_Clade1a\_Cas9  
C\_coli\_ICE1\_Clade1c\_Cas9  
C\_coli\_ICE1\_Clade2\_Cas9  
C\_coli\_ICE1\_Clade3\_Cas9  
LGEH--NLSQDDLNEIAKDITLIKDEIKLKKALAKY-DLNQNQIDSLSKL  
LGEH--NLSQDDLNEIAKDITLIKDEIKLKKALAKY-DLNQNQIDSLSKL  
LGDH--SLSQDDLNEIAKDITLIKDEIKLKKALAKY-DLNQNQIDSLSKL  
LGEH--SLTREELDQIATYITLIKDNKELKITLEKY-SLNNEQIKNLIEI  
LGEH--SLTREELDQIATYITLIKDNKELKITLEKY-SLNNEQIKNLIEI  
LGEH--SLSREELDQIATYITLIKDNKELKITLEKY-SLNNEQIKNLLEI  
LGDGFTNLDKDIILDSIATDITLTKDTATLKEKLNYNVNAEQIEKLSEL  
LGDGFANLDKDIILDSIATDITLTKDTATLKEKLNYNVNAEQIEKLSEL  
LDDSFVNLDDKDIILDSIATDITLTKDMTALKEKLESYNVNLKEQIEKLSEL  
LDDSFVNLDDKDIILDSIATDITLTKDMTALKEKLESYNVNLKEQIEKLSEL  
LDDSFVNLDDKDIILDSIATDITLTKDMTALKEKLESYNVNLKEQIEKLSEL  
\*.: . \* :.:\*\*.\* \*\* \*\* \* . \* \*\* :\*\*\*. \* ::

C\_jejuni\_Cas9  
C\_coli\_Clade1a\_Cas9  
C\_coli\_Clade1b\_Cas9  
C\_coli\_Clade1c\_Cas9  
C\_coli\_Clade2\_Cas9  
C\_coli\_Clade3\_Cas9  
C\_jejuni\_ICE1\_Cas9  
C\_coli\_ICE1\_Clade1a\_Cas9  
C\_coli\_ICE1\_Clade1c\_Cas9  
C\_coli\_ICE1\_Clade2\_Cas9  
C\_coli\_ICE1\_Clade3\_Cas9  
EFKDHLNISFKALKLVTPLMLEGKKYDEACNELNLKVAINEDKKDFLPAF  
EFKDHLNISFKALKLVTPLMLEGKKYDEACNELNLKVAINEDKKDFLPAF  
EFKDHLNISFKALKLITPLMLEGKKYDEACNELNLKVAINEDKKDFLPAF  
DFNDHINLSFKALNLIPLMKEGKRYDEACKLLNLKTKSNNQKDFLPAF  
DFNDHINLSFKALNLIPLMKEGKRYDEACKLLNLKTKSNNQKDFLPAF  
DFNDHINLSFKALNLIPLMKEGKRYDEACKLLNLKTKSNNQKDFLPAF  
VFNDHINLSLALKQIIPLMYEGKRYDEACELCNFTIAKNQEKSEYPLPLF  
VFNDHINLSLALKQIIPLMYEGKRYDEACELCNFTIAKNQEKSEYPLPLF  
AFNDYINLSLALKQIIPLMYEGKRYDEACKLCNFAIAKNQEKSEYPLPLF  
AFNDYINLSLALKQIIPLMYEGKRYDEACKLCNFAIAKNQEKSEYPLPLF  
AFNDYINLSLALKQIIPLMYEGKRYDEACKLCNFAIAKNQEKSEYPLPLF  
\*.:\*\*\*:\*\*\*: : \*\* \*\* :\*\*\*.\* : \* : \*\* :\*\*\* \*

RuvC II

C\_jejuni\_Cas9 NETYYKDEVTPVVLRAIKEYRKVLNALLKKYGKVHK **INIELARE**VGKNH  
 C\_coli\_Clade1a\_Cas9 NETYYKDEVTPVVLRAIKEYRKVLNALLKKYGKVHK **INIELARE**VGKNH  
 C\_coli\_Clade1b\_Cas9 NETYYKDEVTPVVLRAIKEYRKILNALLKKYGKVHK **INIELARE**VGKNH  
 C\_coli\_Clade1c\_Cas9 CDSIFAQELTNPVIVNRAISEYRKVLNALLKKYGKMHK **THIELARD**IGLSK  
 C\_coli\_Clade2\_Cas9 CDSIFAQELTNPVIVNRAISEYRKVLNALLKKYGKMHK **THIELARD**IGLSK  
 C\_coli\_Clade3\_Cas9 CDSIFAQELTNPVIVNRAISEYRKVLNALLKKYGKMHK **THIELARD**IGLSK  
 C\_jejuni\_ICE1\_Cas9 EKTRFAKDISSPVVIRAIACEFRKLLNDIIRRYGSVHK **THLELTRD**FGISF  
 C\_coli\_ICE1\_Clade1a\_Cas9 EKTRFAKDISSPVVIRAIACEFRKLLNDIIRRYGSVHK **THLELTRD**FGISF  
 C\_coli\_ICE1\_Clade1c\_Cas9 EKTRFAKDISSPVVIRAVCEFRKLLNDIIRRYGSVHK **THLELTRD**FGISF  
 C\_coli\_ICE1\_Clade2\_Cas9 EKTRFAKDISSPVVIRAVCEFRKLLNDIIRRYGSVHK **THLELTRD**FGISF  
 C\_coli\_ICE1\_Clade3\_Cas9 EKTRFAKDISSPVVIRAVCEFRKLLNDIIRRYGSVHK **THLELTRD**FGISF  
 . : : . : : . \* : \* \*\* : \* : \* : \* \* : : : \* : \* : \* : \* : \* : \* .

C\_jejuni\_Cas9 SQRAKIEKEQENENYKAKKDAELECEKLGKINSKNILKLRFLKEQKEFCA  
 C\_coli\_Clade1a\_Cas9 SQRAKIEKEQENENYKAKKDAELECEKLGKINSKNILKLRFLKEQKEFCA  
 C\_coli\_Clade1b\_Cas9 SQRAKIEKEQENENYKAKKDAEIECEKLGKINSKNILKLRFLKEQKEFCA  
 C\_coli\_Clade1c\_Cas9 KLRTKIEKEQKENYENNIWALNECENFGLKANTKNILKLRFLKEQKEFCI  
 C\_coli\_Clade2\_Cas9 KLRTKIEKEQKENYENNIWALNECENFGLKANAKNILKLRFLKEQKEFCI  
 C\_coli\_Clade3\_Cas9 KLRAKIEKEQKENYENNIWALNECENFGLKANAKNILKLRFLKEQKEFCI  
 C\_jejuni\_ICE1\_Cas9 SDRKKIIEKEIEQNEQSRIKALETIKELKLEETSKNIQIVRLFEDQKIGCP  
 C\_coli\_ICE1\_Clade1a\_Cas9 NDRKKIIEKEIEQNEQSRIKALETIKELKLEETSKNIQIVRLFEDQKIGCP  
 C\_coli\_ICE1\_Clade1c\_Cas9 NDRKKIIEKEIEQNEQSRIKALETIKELKLEETPKNIQIVRLFEDQKIGCP  
 C\_coli\_ICE1\_Clade2\_Cas9 NDRKKIIEKEIEQNEQSRIKALETIKELKLEETPKNIQIVRLFEDQKIGCP  
 C\_coli\_ICE1\_Clade3\_Cas9 NDRKKIIEKEIEQNEQSRIKALETIKELKLEETPKNIQIVRLFEDQKIGCP  
 . \* \*\* \* : : \* : . \* : : : \* : . \* \* \* : : : \* \* : \*

HNH domain

C\_jejuni\_Cas9 YSGEKIKISDLQDEKML**EIDHI**YPYSRSFDDSYM**NKVLVFTKQ**NQEKLNQ  
 C\_coli\_Clade1a\_Cas9 YSGEKIKISDLQDEKML**EIDHI**YPYSRSFDDSYM**NKVLVFTKQ**NQEKLNQ  
 C\_coli\_Clade1b\_Cas9 YSGEKIKISDLQDEKML**EIDHI**YPYSRSFDDSYM**NKVLVFTKQ**NQEKLNQ  
 C\_coli\_Clade1c\_Cas9 YSGKKISIEHLRDEKTL**EVDHI**YPYSRSFDDSF**LNKVLVFTKEN**NQEKLNQ  
 C\_coli\_Clade2\_Cas9 YSGKKISIEHLRDEKAL**EVDHI**YPYSRSFDDSF**LNKVLVFTKEN**NQEKLNQ  
 C\_coli\_Clade3\_Cas9 YSGKKISIEHLRDEKAL**EVDHI**YPYSRSFDDSF**LNKVLVFTKEN**NQEKLNQ  
 C\_jejuni\_ICE1\_Cas9 YSGLKMDLNRDLDE---L**VIDYI**RPYNRS**LDDSY****NKILTFKKLS**DLKQGK  
 C\_coli\_ICE1\_Clade1a\_Cas9 YSGLKMDLNRDLDE---L**VIDYI**RPYNRS**LDDSY****NKVLTFKKLN**DLKQGK  
 C\_coli\_ICE1\_Clade1c\_Cas9 YSGLKMDLNRDLDE---L**VIDYI**RPYNRS**FDDSY****NKVLTFKKLN**DLKQGK  
 C\_coli\_ICE1\_Clade2\_Cas9 YSGLKMDLNRDLDE---L**VIDYI**RPYNRS**FDDSY****NKVLTFKKLN**DLKQGK  
 C\_coli\_ICE1\_Clade3\_Cas9 YSGLKMDLNRDLDE---L**VIDYI**RPYNRS**FDDSY****NKVLTFKKLN**DLKQGK  
 \*\*\* \* : : . \* : \* : \* : \* \* : \* : \* : \* : \* : \* : \* : \*

C\_jejuni\_Cas9 TPFEAFGNDSAKWQKIEVLAKNLPKQKQKRILDKNYKDKQKDFKDRNLN  
 C\_coli\_Clade1a\_Cas9 TPFEAFGNDSAKWQKIEVLAKNLPKQKQKRILDKNYKDKQKDFKDRNLN  
 C\_coli\_Clade1b\_Cas9 TPFEAFGNDSAKWQKIEVLAKNLPKQKQKRILDKNYKDKQKDFKDRNLN  
 C\_coli\_Clade1c\_Cas9 TPFEAFGANERWSKIQAALQNLQYKKNKILDEAFKQKQKQDFISRNLN  
 C\_coli\_Clade2\_Cas9 TPFEAFGANERWSKIQAALQNLQYKKNKILDEAFKQKQKQDFISRNLN  
 C\_coli\_Clade3\_Cas9 TPFEAFGANERWSKIQAALQNLQYKKNKILDEAFKQKQKQDFISRNLN  
 C\_jejuni\_ICE1\_Cas9 TPFEAFGEDEKLWAEINERIKEYNGKKRKFIFDKFFKDKKPFDFTEQTLQ  
 C\_coli\_ICE1\_Clade1a\_Cas9 TPFEAFGEDEKLWAEINERIKEYNGKKRKFIFDKFFKDKKPFDFTEQTLQ  
 C\_coli\_ICE1\_Clade1c\_Cas9 TPFEAFGEDEKLWAEINERIKEYNGKKRKFIFDKFFKDKKPFDFTEQTLQ  
 C\_coli\_ICE1\_Clade2\_Cas9 TPFEAFGEDEKLWAEINERIKEYNGKKRKFIFDKFFKDKKPFDFTEQTLQ  
 C\_coli\_ICE1\_Clade3\_Cas9 TPFEAFGEDEKLWAEINERIKEYNGKKRKFIFDKFFKDKKPFDFTEQTLQ  
 \*\*\*\*\* : . \* : \* : : \* : \* : \* : \* : \* : \* : \* : \* : \*

C\_jejuni\_Cas9 DTRYIARLVNLNYTKDYLDLFLPLSDDENTKLNQKQKSVHVEAKSGMLTS  
 C\_coli\_Clade1a\_Cas9 DTRYIARLVNLNYTKDYLDLFLPLSDDENTKLNQKQKSVHVEAKSGMLTS  
 C\_coli\_Clade1b\_Cas9 DTRYIARLVNLNYTKDYLDLFLPLSDDENTKLNQKQKSVHVEAKSGMLTS  
 C\_coli\_Clade1c\_Cas9 DTRYISTLIVKYTKDYLDLFLPLDEKEDISLKSGEKGSKIHVQTINGMLTS  
 C\_coli\_Clade2\_Cas9 DTRYISTLIVKYTKDYLDLFLPLDEKEDINLKSGEKGSKIHVQTINGMLTS  
 C\_coli\_Clade3\_Cas9 DTRYISTLIVKYTKDYLDLFLPLDEKEDINLKSGEKGSKIHVQTINGMLTS  
 C\_jejuni\_ICE1\_Cas9 DTRWLTKLVASYLNEYLSFLPISEDENTALGYGEKGSQHVVLSSGMITQ  
 C\_coli\_ICE1\_Clade1a\_Cas9 DTRWLTKLVASYLNEYLSFLPISEDENTALGYGEKGSQHVVLSSGMITQ  
 C\_coli\_ICE1\_Clade1c\_Cas9 DTRWLTKLVASYLNEYLLFLPISEDENTALGYGEKGSQHVVLSSGMITQ  
 C\_coli\_ICE1\_Clade2\_Cas9 DTRWLTKLVASYLNEYLLFLPISEDENTALGYGEKGSQHVVLSSGMITQ  
 C\_coli\_ICE1\_Clade3\_Cas9 DTRWLTKLVASYLNEYLLFLPISEDENTALGYGEKGSQHVVLSSGMITQ  
 \*\*\* : : \* : \* : \* : \* : \* : \* : \* : \* : \* : \* : \*

RuvC III

C\_jejuni\_Cas9 ALRHTWGFSAKDRNNHL**HHAI**DAVI**I**IAYANNSIVKAFSDFKKEQESNSAE  
 C\_coli\_Clade1a\_Cas9 ALRHTWGFSAKDRNNHL**HHAI**DAVI**I**IAYANNSIVKAFSDFKKEQESNSAE  
 C\_coli\_Clade1b\_Cas9 ALRHTWGFSAKDRNNHL**HHAI**DAVI**I**IAYANNSIVKAFSDFKKEQESNSAE  
 C\_coli\_Clade1c\_Cas9 ALRHTWGFSAKDRNNHL**HHAI**DAVI**I**IAYANNSIVKAFSDFKKEQESNSAE  
 VLRHTWGFSAKDRNNHL**HHAI**DAVI**I**IAYANNSIVKAFSDFKKEQESNSAE

C\_coli\_Clade2\_Cas9  
C\_coli\_Clade3\_Cas9  
C\_jejuni\_ICE1\_Cas9  
C\_coli\_ICE1\_Clade1a\_Cas9  
C\_coli\_ICE1\_Clade1c\_Cas9  
C\_coli\_ICE1\_Clade2\_Cas9  
C\_coli\_ICE1\_Clade3\_Cas9

VLRHTWGFAQKDRNHLHHALDATTVAYSTNAIIKAFSDFKKEQELLKAK  
VLRHTWGFAQKDRNHLHHALDATTVAYSTNAIIKAFSDFKKEQELLKAK  
MLRNFWYLGFKNHKDYKNNAMDAIIVAF TTNSII FAFNNFKKELDLAKAE  
MLRNFWYLGFKNHKDYKNNAMDAIIVAF TTNSII FAFNNFKKELDLAKAE  
MLRNFWYLGFKNYKDYKNNAMDAIIVAF TTNSII FAFNNFKKELDLAKAE  
MLRNFWYLGFKNYKDYKNNAMDAIIVAF TTNSII FAFNNFKKELDLAKAE  
MLRNFWYLGFKNYKDYKNNAMDAIIVAF TTNSII FAFNNFKKELDLAKAE

\*\* : \* : . \* : : : : : : : \*\* : \* : \* : . \* : \* : \* : \* : \* : \* : \* : . . .

C\_jejuni\_Cas9  
C\_coli\_Clade1a\_Cas9  
C\_coli\_Clade1b\_Cas9  
C\_coli\_Clade1c\_Cas9  
C\_coli\_Clade2\_Cas9  
C\_coli\_Clade3\_Cas9  
C\_jejuni\_ICE1\_Cas9  
C\_coli\_ICE1\_Clade1a\_Cas9  
C\_coli\_ICE1\_Clade1c\_Cas9  
C\_coli\_ICE1\_Clade2\_Cas9  
C\_coli\_ICE1\_Clade3\_Cas9

LYAKKISELDYKNKRKFFFPFSGFRQKVLDKIDEIFVSKPERKKPSGALH  
LYAKKISELDYKNKRKFFFPFSGFRQKVLDKIDEIFVSKPERKKPSGALH  
LYAKKISELDYKNKRKFFFPFSGFRQKVLDKIDEIFVSKPERKKPSGALH  
LYAKELTSDSYKHQAKFFFPFEGFREQILNQINKLQVSKPPRKRARGALH  
LYAKELTNSYKHQAKFFFPFEGFREQILNQINKLQVSKPPRKRARGALH  
LYAKELTSDSYKHQAKFFFPFEGFREQILIQINKLQVSKPPRKRARGALH  
FYANKISESDYLLKRKFLPPFSGFKEQALEKVKNI FVSHSLKIKNKGTLH  
FYANKISESDYLLKRKFLPPFSGFKEQALEKVKNI FVSHSLKIKNKGTLH  
FYANKISESDYLLKRKFLPPFKGFKEQAFKVNNI FVSHSLRIKKNKGALH  
FYANKISESDYLLKRKFLPPFKGFKEQAFKVNNI FVSHSLRIKKNKGALH  
FYANKISESDYLLKRKFLPPFKGFKEQAFKVNNI FVSHSLRIKKNKGALH

: \*\* : \* : . . \* : \* : \* : \* : \* : \* : \* : \* : \* : \* : \* : \* : \* : \* : \* : \*

C\_jejuni\_Cas9  
C\_coli\_Clade1a\_Cas9  
C\_coli\_Clade1b\_Cas9  
C\_coli\_Clade1c\_Cas9  
C\_coli\_Clade2\_Cas9  
C\_coli\_Clade3\_Cas9  
C\_jejuni\_ICE1\_Cas9  
C\_coli\_ICE1\_Clade1a\_Cas9  
C\_coli\_ICE1\_Clade1c\_Cas9  
C\_coli\_ICE1\_Clade2\_Cas9  
C\_coli\_ICE1\_Clade3\_Cas9

EETFRKEEEFYQSYGKEGVLKALELGKIRKVNKIVKN--GDMFRVDIF  
EETFRKEEEFYQSYGKEGVLKALELGKIRKVNKIVKN--GDMFRVDIF  
EETFRKEEEFYQSYGKEGVLKALELGKIRKVNKIVKN--GDMFRVDIF  
KETFYSKDEMICKYNSQEGVEIALNCGKIRKIGTKYVEN--DTMVRIDIF  
KETFYSKDEMICKYNSQEGVEIALNCGKIRKIGTKYVEN--DTMVRIDIF  
KETFYPKDEMICKYNSQEGLEIALNCGKIRKIGTKYVEN--DTIVRIDIF  
ELTPLKIKELKN TYG---DLDLAVKLGKIRKYNDKYYANANGSLVRADLF  
ELTPLKIKELKN TYG---DLDLAVKLGKIRKYNDKYYVNAKGLARTDLF  
NLNPLKIKELKN TYK---DLEFAIASGRIRNYNGKFYSNANGSLVRVDLF  
NLNPLKIKELKN TYK---DLEFAIASGRIRNYNGKFYSNANGSLVRVDLF  
NLNPLKIKELKN TYK---DLEFAIASGRIRNYNGKFYSNANGSLVRVDLF

: . . \* : . \* : . : \* : \* : \* : \* : . \* \* : . : \* : \*

C\_jejuni\_Cas9  
C\_coli\_Clade1a\_Cas9  
C\_coli\_Clade1b\_Cas9  
C\_coli\_Clade1c\_Cas9  
C\_coli\_Clade2\_Cas9  
C\_coli\_Clade3\_Cas9  
C\_jejuni\_ICE1\_Cas9  
C\_coli\_ICE1\_Clade1a\_Cas9  
C\_coli\_ICE1\_Clade1c\_Cas9  
C\_coli\_ICE1\_Clade2\_Cas9  
C\_coli\_ICE1\_Clade3\_Cas9

KHKKTNKFYAVPIYTMDFALKVLPNKAV--ARSKKGEIKDWILMDENYEF  
KHKKTNKFYAVPIYTMDFALKVLPNKAV--ARSKKGEIKDWILMDENYEF  
KHKKTNKFYAVPIYTMDFALKVLPNKAV--ARSKKGEIKDWILMDENYEF  
KKQ--NKFYAIPIYTMDFALGVLPNKI VIGKDKKGNPKQWQEIDESYEF  
KKQ--NKFYAIPIYTMDFALGVLPNKI VIGKDKKGNPKQWQEIDESYEF  
KKQ--NKIYAIPIYTMDFALGVLPNKI VIGKDKKGNPKQWQEIDESYEF  
VDK-KNKFHAVSIYKADFSTKCLPNKTP--ATTSNGETKEGIEMNENYEF  
VDK-KNKFHAVSIYKADFSTKCLPNKTP--ATTSNGETKEGIEMNENYEF  
VDK-KSKFHAVPIYKADFSTKQLPNKTP--AAISNGKIKEGVEMNENYEF  
VDK-KSKFHAVPIYKADFSTKQLPNKTP--AAISNGKIKEGVEMNENYEF  
VDK-KSKFHAVPIYKADFSTKQLPNKTP--AAISNGKIKEGVEMNENYEF

. : . \* : \* : \* : \* : \* : \* : \* : . . \* : \* : \* : \* : \*

C\_jejuni\_Cas9  
C\_coli\_Clade1a\_Cas9  
C\_coli\_Clade1b\_Cas9  
C\_coli\_Clade1c\_Cas9  
C\_coli\_Clade2\_Cas9  
C\_coli\_Clade3\_Cas9  
C\_jejuni\_ICE1\_Cas9  
C\_coli\_ICE1\_Clade1a\_Cas9  
C\_coli\_ICE1\_Clade1c\_Cas9  
C\_coli\_ICE1\_Clade2\_Cas9  
C\_coli\_ICE1\_Clade3\_Cas9

CFSLYKDSLILIQTKDMQEPFVYNAFTSSTVSLIVSKHDNKFETLSKN  
CFSLYKDSLILIQTKDMQEPFVYNAFTSSTVSLIVSKHDNKFETLSKN  
CFSLYKDSLILIQTKDMQEPFVYNAFTSSTVSLIVSKHDNKFETLSKN  
CFSLHKDDLVL IQKQDMQEPFAFYNGFDISNSSICVEKHNDNKFENLTDN  
CFSLHKDDLVL IQKQDMQEPFAFYNGFDISNSSICVEKHNDNKFENLTDN  
CFSLHKDDLVL IQKQDMQEPFAFYNSFDISNSSICVEKHNDNKFENLTDN  
CFSLYKNTPI SVKIKGMKEPIICYHGFNTSGSKI TYKKHDNNYNLSED  
CMSLYKNTPI SVKIKGMKEPIICYHGFNTSGSKI TYKKHDNNYNLSED  
YISLYKNTPI SVKIKGMKEPIICYHGFNISGSQI IYKKHDNNYNLSDK  
YISLYKNTPI SVKIKGMKEPIICYHGFNISGSQI IYKKHDNNYNLSDK  
YISLYKNTPI SVKIKGMKEPIICYHGFNISGSQI IYKKHDNNYNLSDK

: \* : \* : \* : \* : \* : \* : \* : \* : \* : \* : \* : \* : \* : \* : \* : \* : \*

C\_jejuni\_Cas9  
C\_coli\_Clade1a\_Cas9  
C\_coli\_Clade1b\_Cas9  
C\_coli\_Clade1c\_Cas9  
C\_coli\_Clade2\_Cas9  
C\_coli\_Clade3\_Cas9  
C\_jejuni\_ICE1\_Cas9  
C\_coli\_ICE1\_Clade1a\_Cas9  
C\_coli\_ICE1\_Clade1c\_Cas9  
C\_coli\_ICE1\_Clade2\_Cas9

QKILFKNANEKEVIAK SIGIQNLKVFEKYIVSALGEVTKAEFRQREDFKK  
QKILFKNANEKEVIAK SIGIQNLKVFEKYIVSALGEVTKAEFRQREDFKK  
QKILFKNANEKEVIAK SIGIQNLKVFEKYIVSALGEVTKAEFRQREDFKK  
QKLLFTNAEEGNVAKKIGIQGLKIFEKYIITPLGEKIKADFKPREDIAL  
QKLLFTNAEEGNVAKKIGIQGLKIFEKYIITPLGEKIKADFKPREDIAL  
QKLLFTNAEEGNVAKKIGIQGLKIFEKYIITPLGEKIKADFKLREDIAL  
EMVVRKNDKE-----SIAVGKILEIKKYISIPSGELSLIENEERKWF--  
EMVVRKNDKE-----SIVVGKILEIKKYISIPSGELSLIENEERKWF--  
EMVVRKNDKE-----SIVVGKILEIKKYISIPSGELSLIENEERKWF--  
EMVVRKNDKE-----SIVVGKILEIKKYISIPSGELSLIENEERKWF--



|                          |                                                   |
|--------------------------|---------------------------------------------------|
| C_coli_ICE1_Clade3_Cas9  | EMAIFRKGDK-----AIAIGRILEIKKYNISPSGELILIENEERKWF-- |
|                          | : : * : .: : : : : : * * : . * : :                |
| C_jejuni_Cas9            | -----                                             |
| C_coli_Clade1a_Cas9      | -----                                             |
| C_coli_Clade1b_Cas9      | -----                                             |
| C_coli_Clade1c_Cas9      | KTSKKHGL                                          |
| C_coli_Clade2_Cas9       | KTSKKHGI                                          |
| C_coli_Clade3_Cas9       | KTSKKHGL                                          |
| C_jejuni_ICE1_Cas9       | -----                                             |
| C_coli_ICE1_Clade1a_Cas9 | -----                                             |
| C_coli_ICE1_Clade1c_Cas9 | -----                                             |
| C_coli_ICE1_Clade2_Cas9  | -----                                             |
| C_coli_ICE1_Clade3_Cas9  | -----                                             |

# ICE1-like elements in *Campylobacter*

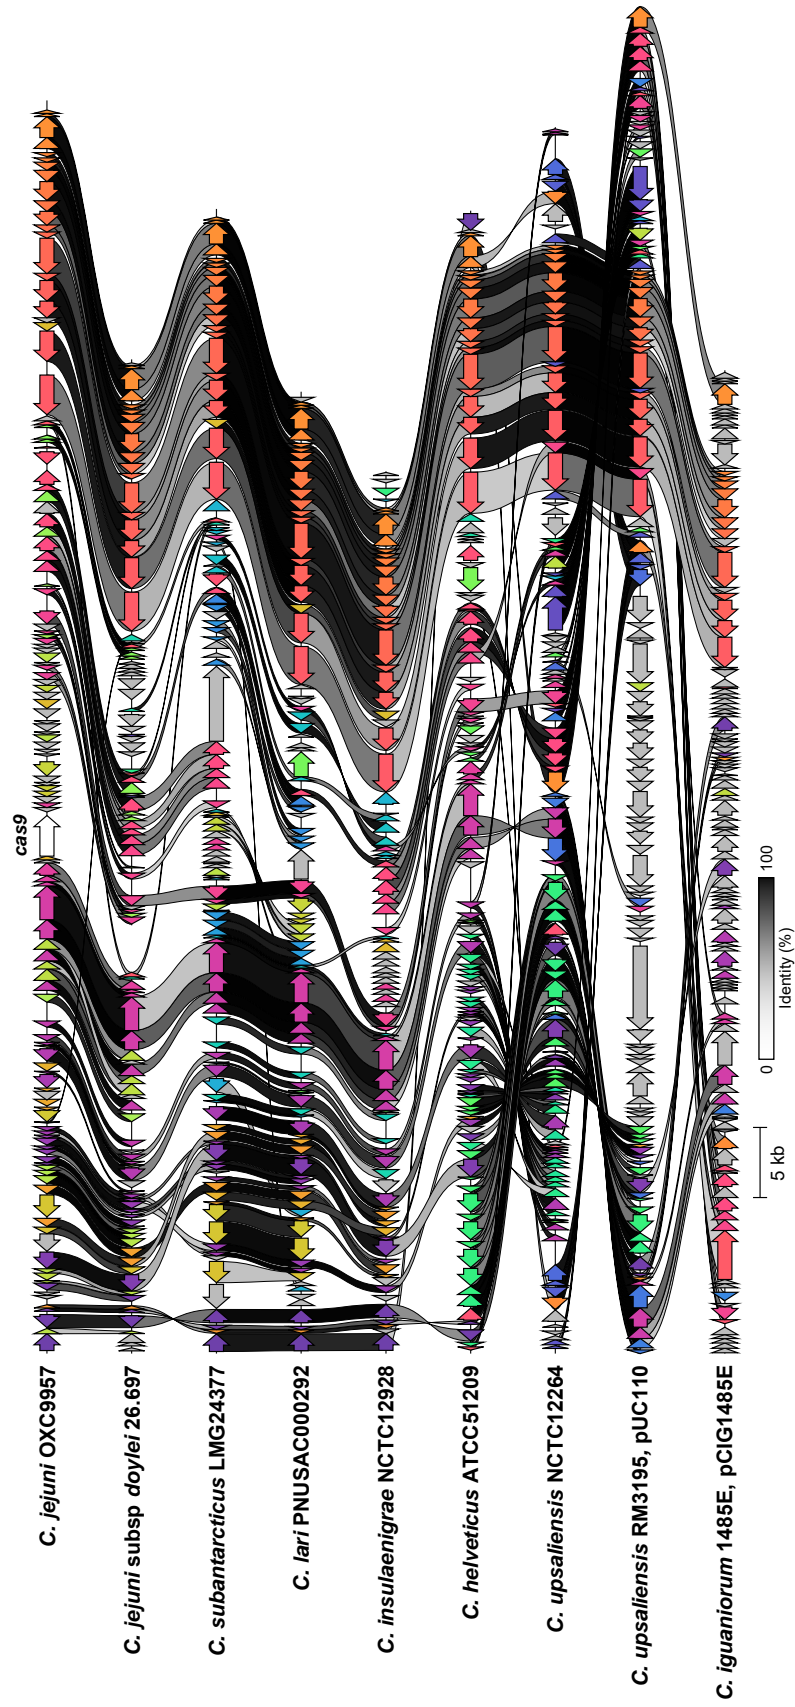

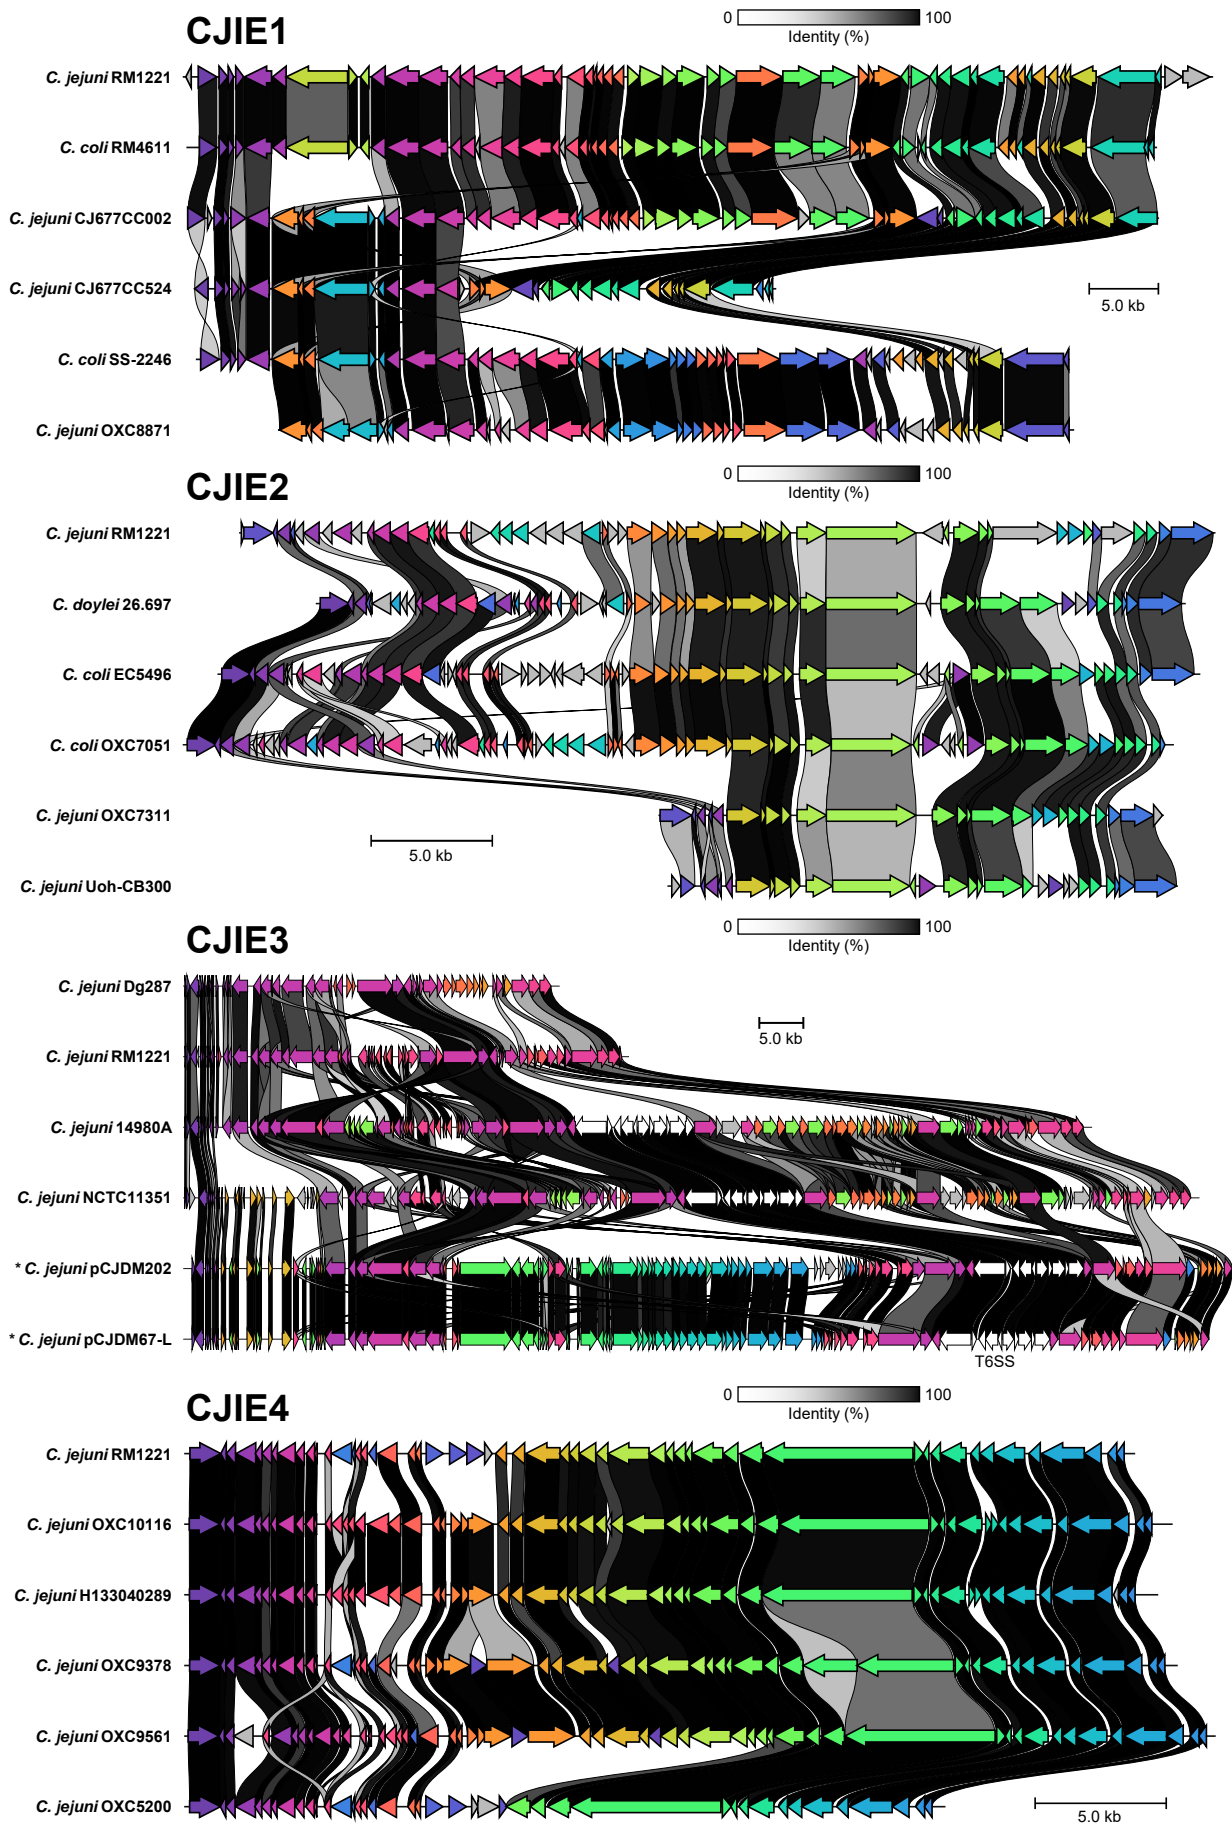

Van Vliet et al, Figure S3

### pCC42

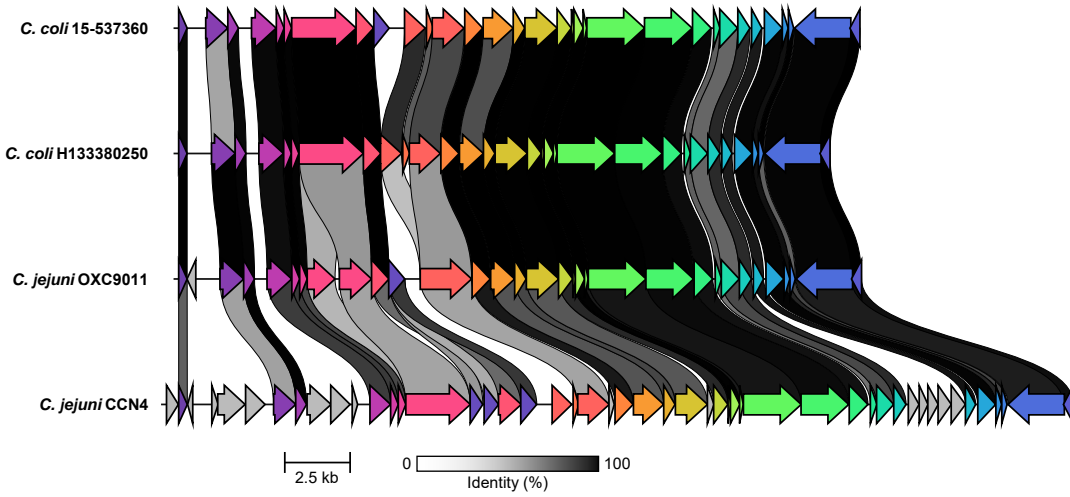

### pTet

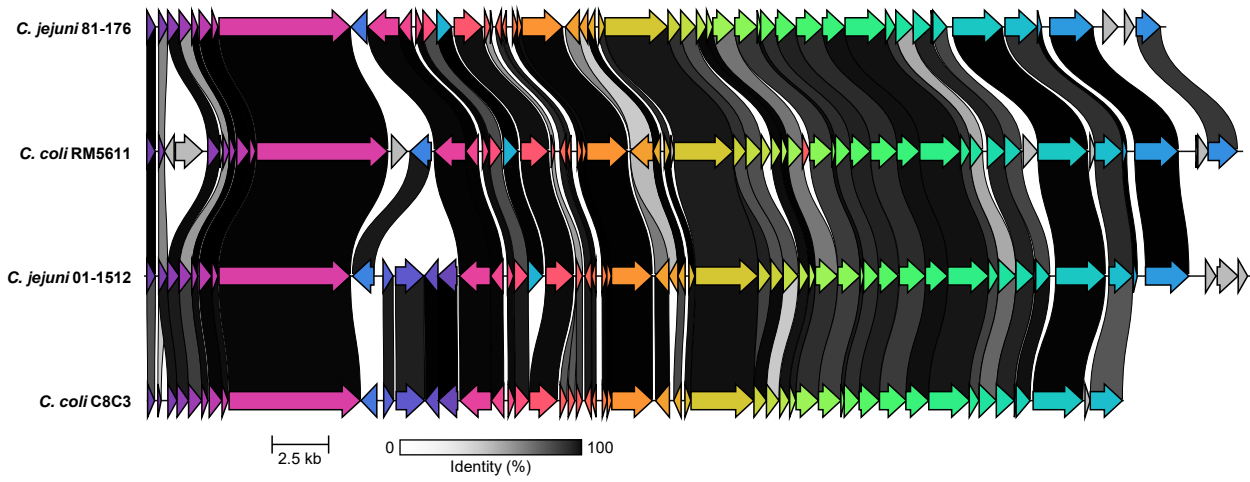

### pVir

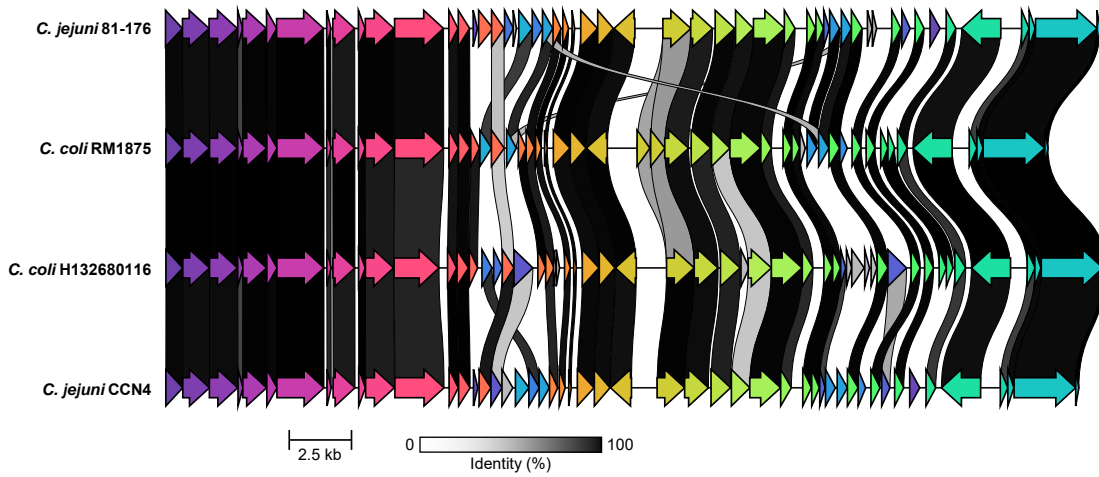

**Table S4.** Distribution of CampyICE1 plasmid-specific CRISPR-spacers and pVir, pTet and pCC42 plasmids in CampyICE1-positive *C. jejuni* and *C. coli*.

| plasmid<br>spacer <sup>a</sup>  | no plasmid |                      | plasmid present |                                     |                      |
|---------------------------------|------------|----------------------|-----------------|-------------------------------------|----------------------|
|                                 | absent     | matched <sup>b</sup> | absent          | $\Delta$ Cas9+mismatch <sup>b</sup> | matched <sup>b</sup> |
| <b><i>C. jejuni</i> (n=133)</b> |            |                      |                 |                                     |                      |
| pVir                            | 115        | 16                   | 2               | 0+0                                 | 0                    |
| pTet                            | 11         | 105                  | 2               | 2+5                                 | 8                    |
| pCC42                           | 22         | 97                   | 3               | 0+4                                 | 7                    |
| <b><i>C. coli</i> (n=81)</b>    |            |                      |                 |                                     |                      |
| pVir                            | 27         | 50                   | 3               | 1+0                                 | 0                    |
| pTet                            | 8          | 58                   | 3               | 1+11                                | 0                    |
| pCC42                           | 2          | 57                   | 0               | 2+9                                 | 11                   |

a. Plasmid spacers identified by CRISPRfinder, CRISPR Recognition Tool CRT and manual searches were screened for matches with *Campylobacter* plasmids using CRISPRtarget.

b. CampyICE1-positive genomes positive for pVir, pTet and pCC42 were searched with the plasmid-targeting spacers using BLAST, and recorded for perfect matches and imperfect matches. This was to allow for possible sequence differences with the reference pVir, pTet and pCC42 plasmid sequences, or alternatively to detect mutations introduced to escape CRISPR-Cas functionality. In addition, the presence of a full-length *cas9* gene was checked, as this is required for CRISPR-Cas9 functionality.
